# Supplementary material for: Inter-Regional Proteomic Profiling of the Human Brain Using an Optimized Protein Extraction Method from Formalin-Fixed Tissue to Identify Signaling Pathways
Source: MDPI journal article supplement (doi:10.3390/ijms24054283), 2023-02-21
Supplement: s1 [file s1]

## Supplementary Materials

**Table S1. TOP 20 most enriched proteins (vs occipital cortex) Gene Symbol**

| Pre-frontal | Motor   | Temporal |
|-------------|---------|----------|
| PLCB3       | MRPL12  | RGS20    |
| PSMD1       | AMY1A   | DSG1     |
| PSMD11      | AMY1B   | H1-1     |
| PSMC5       | AMY1C   | RAB2B    |
| MRPS18B     | CARNS1  | PTPRA    |
| RPS15       | DOHH    | DOHH     |
| MPP1        | DYNLRB1 | POF1B    |
| RPL3        | GCLC    | RGS6     |
| RPL38       | GSTK1   | MVB12B   |
| ACTR10      | COL2A1  | PLCB3    |
| ACTR2       | POF1B   | PSMD1    |
| ACTR3B      | RGS6    | PSMD11   |
| ADGRB2      | IDI1    | ACTR10   |
| ARL6IP1     | MDP1    | ARL6IP1  |
| AIF1L       | MVB12B  | AIF1L    |
| FTO         | PLCB3   | AIMP2    |
| AIMP2       | PSMD1   | AP3D1    |
| AP3D1       | PSMD11  | BZW1     |
| ATL1        | PSMC5   | BAD      |
| BZW1        | RPS15   | C2CD4C   |

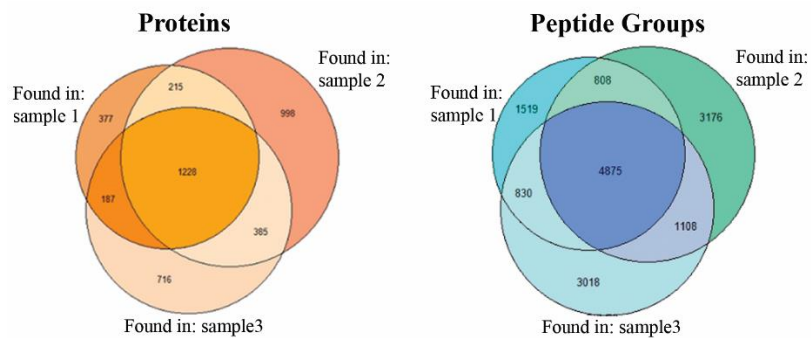

**Figure S1.** Venn diagram of proteins and peptide groups identified in technical replicates prepared from one biological motor cortex brain tissue sample analyzed by LC-MS/MS and Proteome Discoverer 2.4.

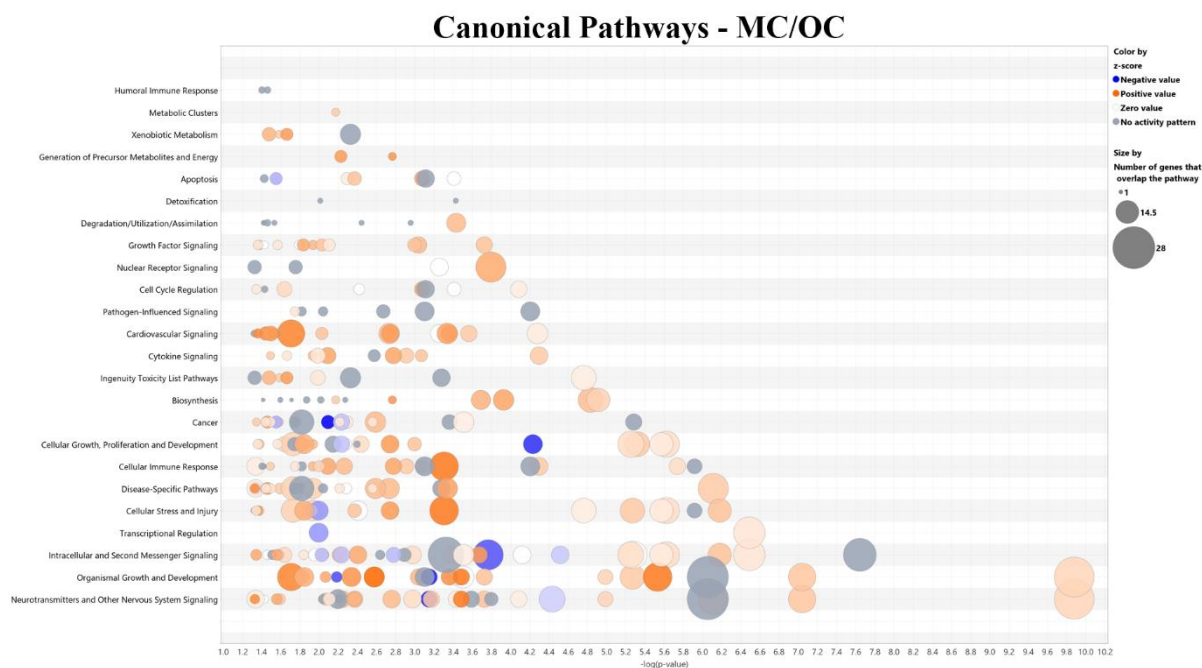

**Figure S2.** IPA Bubble Chart of motor cortex compared to occipital cortex Canonical Pathways. Orange, positive z-score; Blue, negative z-score; White, z-score=0; Gray, z-score not predicted.

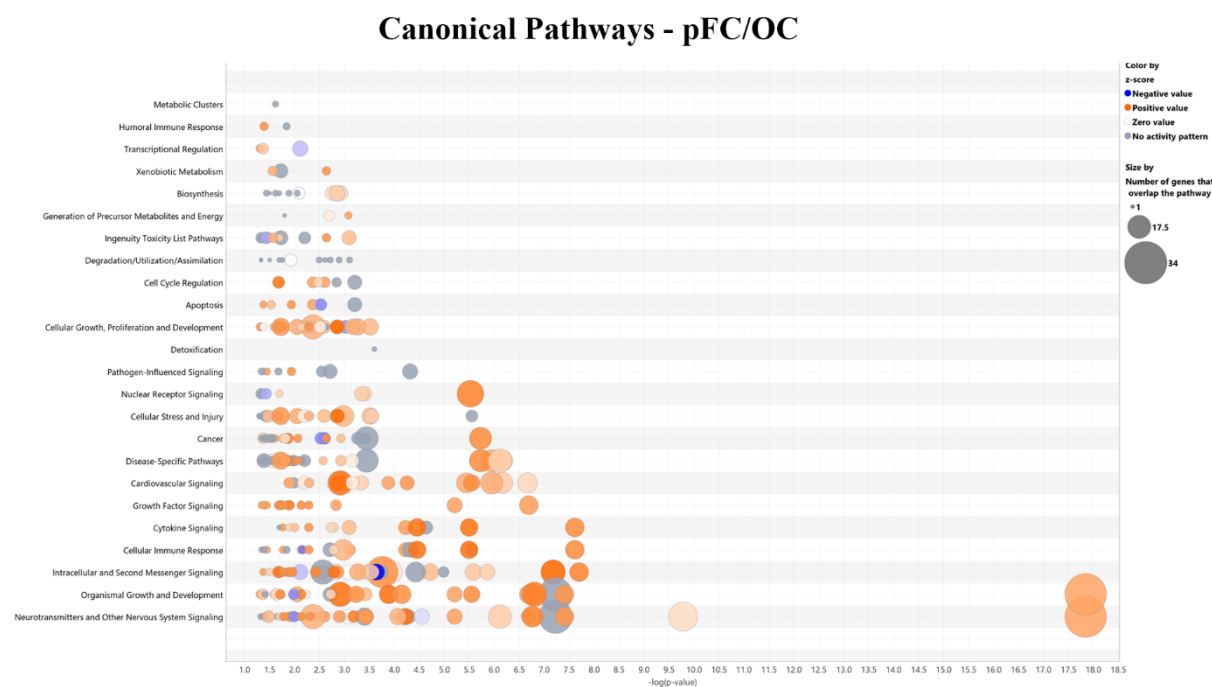

**Figure S3** IPA Bubble Chart of pre-frontal cortex compared to occipital cortex Canonical Pathways. Orange, positive z-score; Blue, negative z-score; White, z-score=0; Gray, z-score not predicted.

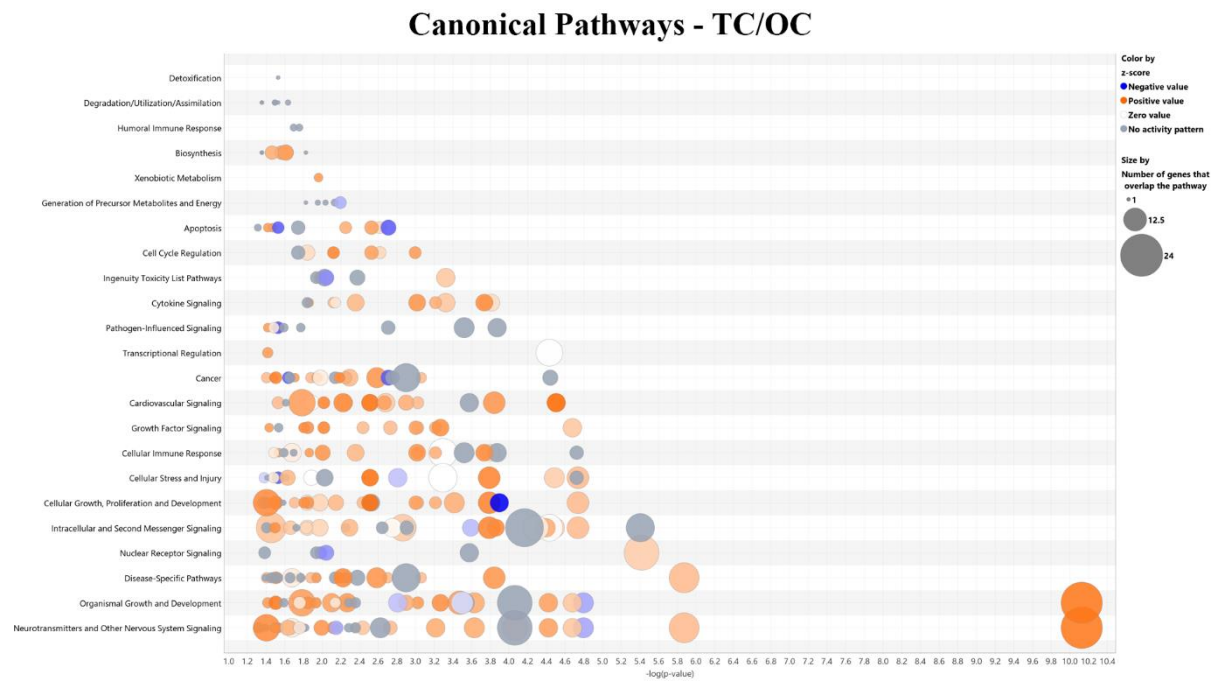

**Figure S4** IPA Bubble Chart of temporal cortex compared to occipital cortex Canonical Pathways. Orange, positive  $z$ -score; Blue, negative  $z$ -score; White,  $z$ -score=0; Gray,  $z$ -score not predicted.
